# Supplementary material
Source: PubMed Central journal article supplement (PMC2515860)
Supplement: NIHMS61818-supplement-si20061110_112.pdf [file NIHMS61818-supplement-si20061110_112.pdf]

## Supporting Information

**SPR Imaging Measurements:** Figure S.1 shows a schematic of the SPR imager (GWC Technologies) used to obtain all the data presented in the paper. Briefly, near-infrared excitation from an incoherent white light source is passed through a polarizer to generate p-polarized light. This collimated p-polarized light is then used to illuminate a flow cell/gold chip/prism assembly at a fixed incident angle near the SPR angle. The reflected light is directed through a band-pass filter centered at 830 nm and collected with a CCD camera. The data was collected using the software package V++ (Digital Optics) and further analyzed using the software package NIH Image V. 1.63.

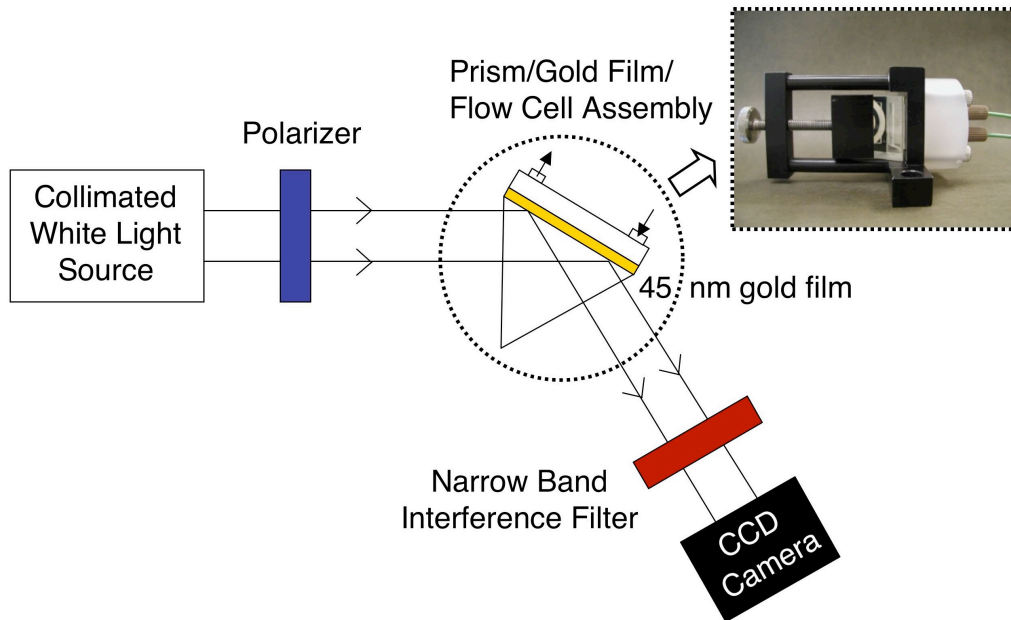

*Figure S.1. A simplified schematic diagram of SPR imager.*
